# Supplementary material
Source: PubMed Central journal article supplement (PMC11348890)
Supplement: NIHMS2000918-supplement-1.pdf [file NIHMS2000918-supplement-1.pdf]



**THE JOURNAL OF  
CLINICAL PSYCHIATRY**  
THE OFFICIAL JOURNAL OF THE AMERICAN SOCIETY OF CLINICAL PSYCHOPHARMACOLOGY

## **Supplementary Material**

**Article Title:** Adverse Childhood Experiences and Risk for First-Episode Major Depression During the Menopause Transition

**Authors:** Cynthia Neill Epperson, MD; Mary D. Sammel, ScD; Tracy L. Bale, PhD; Deborah R. Kim, MD; Sarah Conlin, BA; Stephanie Scalice, MA; Katharine Freeman, BA; and Ellen W. Freeman, PhD

**DOI Number:** <https://doi.org/10.4088/JCP.16m10662>

### **List of Supplementary Material for the article**

1. [Supplemental Methods](#) Supplemental Methods
2. [eTable 1](#) Baseline Characteristics for Current Study Cohort Versus Those Who Dropped Out of the Penn Ovarian Aging Study
3. [eFigure 1](#) Proportion of Women With Lifetime MDD Based on Number of ACEs

### **Disclaimer**

This Supplementary Material has been provided by the author(s) as an enhancement to the published article. It has been approved by peer review; however, it has undergone neither editing nor formatting by in-house editorial staff. The material is presented in the manner supplied by the author.

© Copyright 2017 Physicians Postgraduate Press, Inc.

It is illegal to post this copyrighted PDF on any website. ♦ © 2017 Copyright Physicians Postgraduate Press, Inc.

## **SUPPLEMENTAL METHODS:**

### *Menopausal Status:*

At every assessment period, each participant was assigned to one of the following categories based on bleeding patterns: Stage 1) pre-menopausal: regular menstrual cycles in the 22- to 35-day range; Stage 2) late pre-menopause: change in cycle length of 7 days or longer in either direction from the participant's own baseline for at least 1 cycle; Stage 3) early transition: change in cycle length of 7 days or longer in either direction from the participant's own baseline for at least 2 cycles up to 60 days of amenorrhea; Stage 4) late transition: 3–11 months of amenorrhea; and Stage 5) post-menopausal: 12 months or more of amenorrhea without hysterectomy.

### *Statistical Methods:*

Students t test or chi square methods were utilized to determine whether women remaining in the POAS cohort and available for inclusion in this analysis were similar with respect to demographics, body mass index, baseline depression symptom severity and history of depression to the participants that comprised the original cohort (Supplemental Table 1).

For the purposes of this study, we defined the high ACE group as those women with 2+ ACEs. A binomial test of proportions was used to compare lifetime prevalence of MDD in individuals with 1 ACE to 2 ACEs directly, considering total, prepubertal and postpubertal ACEs separately (Supplemental Figure 1).

## **SUPPLEMENTAL RESULTS**

**Supplemental Table 1. Baseline Characteristics for Current Study Cohort Versus Those Who Dropped Out of the Penn Ovarian Aging Study**

| VARIABLE                 | CURRENT STUDY COHORT (N=243) |      | DROP OUTS FROM POAS (N=195) |      | P VALUE |
|--------------------------|------------------------------|------|-----------------------------|------|---------|
|                          | Mean                         | SD   | Mean                        | SD   |         |
| Age                      | 41.6                         | 3.5  | 41.3                        | 3.4  | 0.422   |
| Body Mass Index          | 29.3                         | 8.3  | 29.1                        | 7.3  | 0.776   |
|                          | N                            | %    | N                           | %    |         |
| Race                     |                              |      |                             |      |         |
| Caucasian                | 128                          | 52.7 | 89                          | 46.1 | 0.174   |
| African American         | 115                          | 47.3 | 104                         | 53.9 |         |
| Education                |                              |      |                             |      |         |
| High School or Less      | 98                           | 40.3 | 94                          | 48.7 | 0.080   |
| College                  | 145                          | 59.7 | 99                          | 51.3 |         |
| Employed                 | 200                          | 82.3 | 155                         | 80.3 | 0.595   |
| Marital Status (Married) | 138                          | 56.8 | 112                         | 58.0 | 0.795   |
| CES-D >=16               | 97                           | 40.3 | 85                          | 44.0 | 0.426   |
| MDD Diagnosis (Yes)      | 23                           | 9.5  | 24                          | 12.4 | 0.321   |

LEGEND: Comparison between the entire POAS cohort and those for whom ACE-Q data was collected revealed no significant baseline differences with respect to race, age, BMI, employment, CES-D scores, smoking, or marital status (all  $p > 0.05$ ). Likewise, the proportion with lifetime or incident menopause MDD diagnoses at baseline and across the study did not differ ( $p > 0.05$ ).

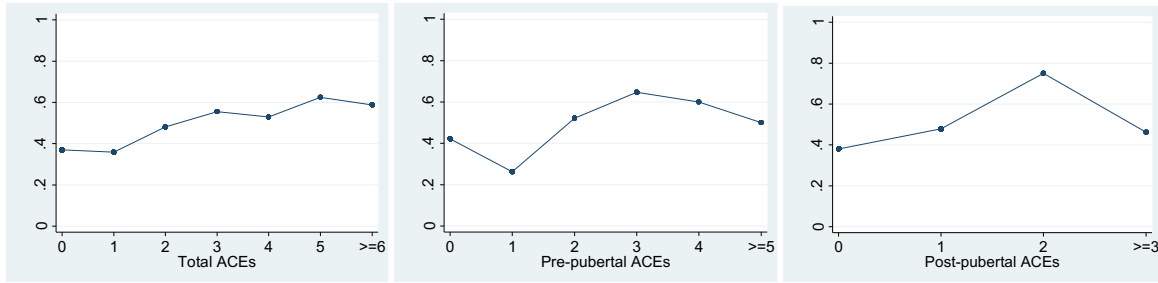

### Supplemental Figure 1: Proportion of Women With Lifetime MDD Based on Number of ACEs

**LEGEND:** Comparing lifetime incidence of major depressive disorder (MDD) between women with 1 ACE and women with 2 ACEs for each definition of ACE (total, prepubertal and postpubertal), there was a significant increase in MDD risk when considering pre-pubertal ACE [Pearson Chi-square (df=1) =4.95, p-value=0.026], but not for post-pubertal ACE [Pearson Chi-square (df=1) = 3.55, p-value= 0.060] or total ACE [Pearson Chi-square (df=1) = 1.27, p-value=0.261].
